# Supplementary material
Source: PubMed Central journal article supplement (PMC3345028)
Supplement: NIHMS373062-supplement-supplementary_figures_and_text.pdf [file NIHMS373062-supplement-supplementary_figures_and_text.pdf]

# Supplemental Figure 1 (Jiayi Yang)

## A

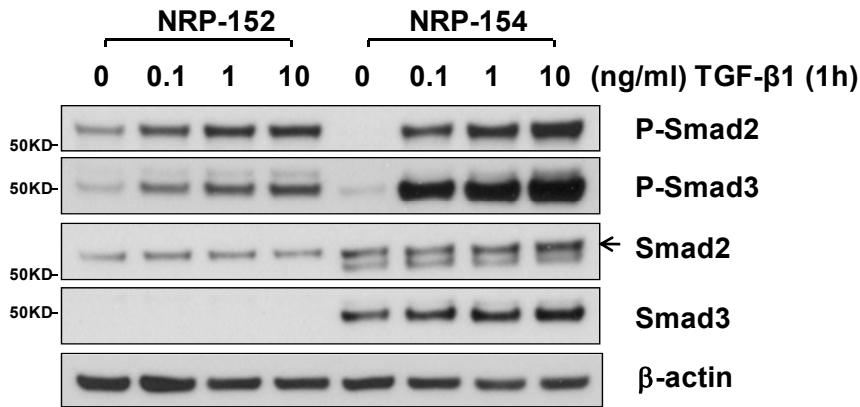

## B

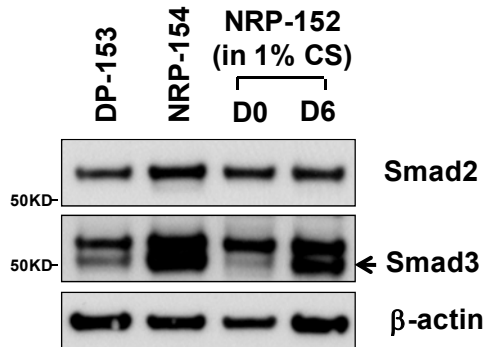

## C

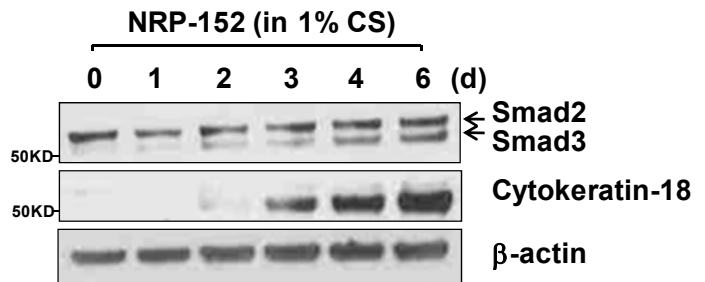

## Supplemental section (Cancer Research Priority Report)

### Materials and Methods

**Reagents.** Sources were:  $\alpha$ -P-Smad2 (Ser 465/467) [#3101],  $\alpha$ -P-Smad3 (Ser 423/425) [#9514] (Cell signaling, Danvers, MA);  $\alpha$ -cytokeratin 18 (a gift from Dr. Janet Woodcock Mitchell).

**Cell culture.** DP-153 rat prostate epithelial cell line was established and cultured as described earlier (1).

### Figure Legends

**Fig. S1: Differential expression of Smad2 versus Smad3 in prostate epithelial cells correlates with their basal or luminal phenotype.** (A) Levels of Smad2 and Smad3 in NRP-152 and NPR-154 cells, and their activation by increasing doses of TGF- $\beta$ 1 as measured by phospho-specific antibodies (P-Smad2, P-Smad3). (B) Comparison of Smad2 and Smad3 expression levels in DP-153 (basal), NRP-154 (luminal), and NRP-152 (basal) rat prostate epithelial cells. Parental NRP-152 cells (indicated as D0) were allowed to differentiate for 6 days (indicated as D6) in 1% calf serum condition (1% CS) towards a luminal phenotype, as observed previously (2). (C) Time course analysis of NRP-152 cells undergoing basal-luminal transdifferentiation. Cytokeratin-18 is a luminal marker.

### References

1. Song, K., Cornelius, S. C., and Danielpour, D. Development and characterization of DP-153, a nontumorigenic prostatic cell line that undergoes malignant transformation by expression of dominant-negative transforming growth factor beta receptor type II. *Cancer Res*, 63: 4358-4367, 2003.
2. Danielpour, D. Transdifferentiation of NRP-152 rat prostatic basal epithelial cells toward a luminal phenotype: regulation by glucocorticoid, insulin-like growth factor-I and transforming growth factor-beta. *J Cell Sci*, 112 (Pt 2): 169-179, 1999.
